# Supplementary material
Source: publisher figshare collection journal article supplement (https://acs.figshare.com/ndownloader/files/3861034)

## Pseudo-solid, shear-thinning gel formation in binary dispersions of metal oxide nanoparticles at low volume fractions

J. S. Weston<sup>†</sup>, D. Venkataramani<sup>‡</sup>, C.P. Aichele<sup>\*,\*</sup>, B.P. Grady<sup>†</sup>, J. Harwell<sup>†</sup>, and D. Resasco<sup>†</sup>

<sup>†</sup>School of Chemical, Biological and Materials Engineering, University of Oklahoma, Norman, OK 73019

<sup>‡</sup>School of Chemical Engineering, Oklahoma State University, Stillwater, OK 74078

and Center for Interfacial Reaction Engineering (CIRE), Oklahoma

\*Corresponding author – [clint.aichele@okstate.edu](mailto:clint.aichele@okstate.edu)

## SUPPORTING INFORMATION

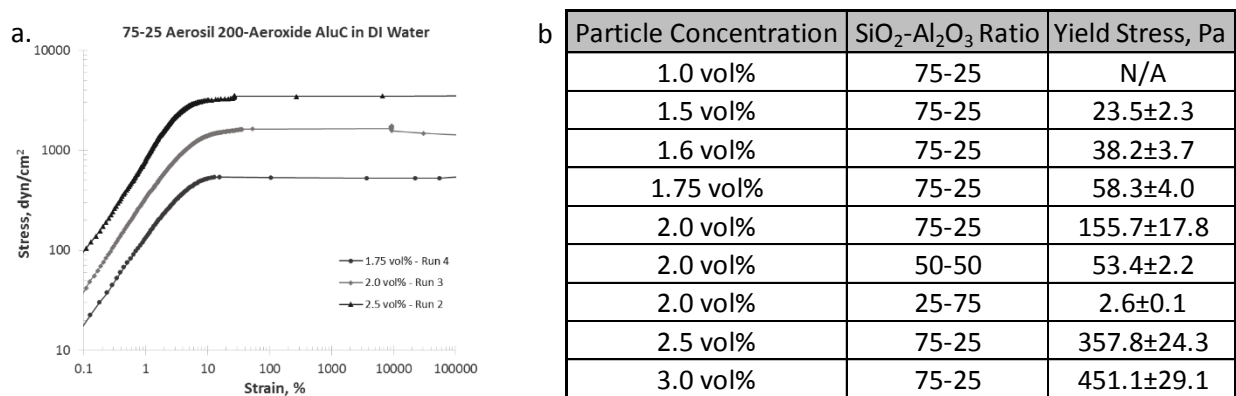

Figure 1 (SI): Three examples of stress-strain curves obtained during a yield stress experiment on the gels (a.) and a table of yield stress values for gels with a variety of particle ratios and particle concentrations (b.) All samples were tested at solution pH = 7

Yield stresses were measured using an SR-5000 rheometer (cone and plate geometry) by running a stress ramp experiment and measuring the sample strain (%), the yield stress was defined as the point where plastic deformation of the sample begins (stress-strain curve levels off), as seen in Figure 1 (SI) a.). Each yield stress value in the table (Figure 1 (SI) b.) was determined by averaging a minimum of four independent experiments, with the listed  $\pm$  value representing the standard deviation between the separate experiments. No major issues with wall-slip were encountered during these experiments. Experiments have also been completed to measure the compressive yield stress (stress required to compress the gel network, leaving a clear, aqueous supernatant above, results still being interpreted) and are currently conducting frequency sweep tests to measure  $G'/G''$  values for the gel samples (these results are currently on hold due to maintenance on our strain-controlled rheometer).

The “fraction of a second” relaxation time mentioned in the results and discussion section is based on direct observation that the gels do not exhibit any noticeable ‘setting’ time required to regain their pseudo-solid characteristics. Further investigations will be made using a strain-controlled rheometer and this information will be included in a rheology-focused article; however given the rapidity of the recovery such experiments may not be fruitful.

Below are two  $G'/G''$  vs. frequency plots for a 75-25 Aerosil 200-Aeroxide Alu C gel with a total particle concentration of 2.0 vol%. Data was gathered using a Rheometrics Scientific RSA II dynamic mechanical analyzer.

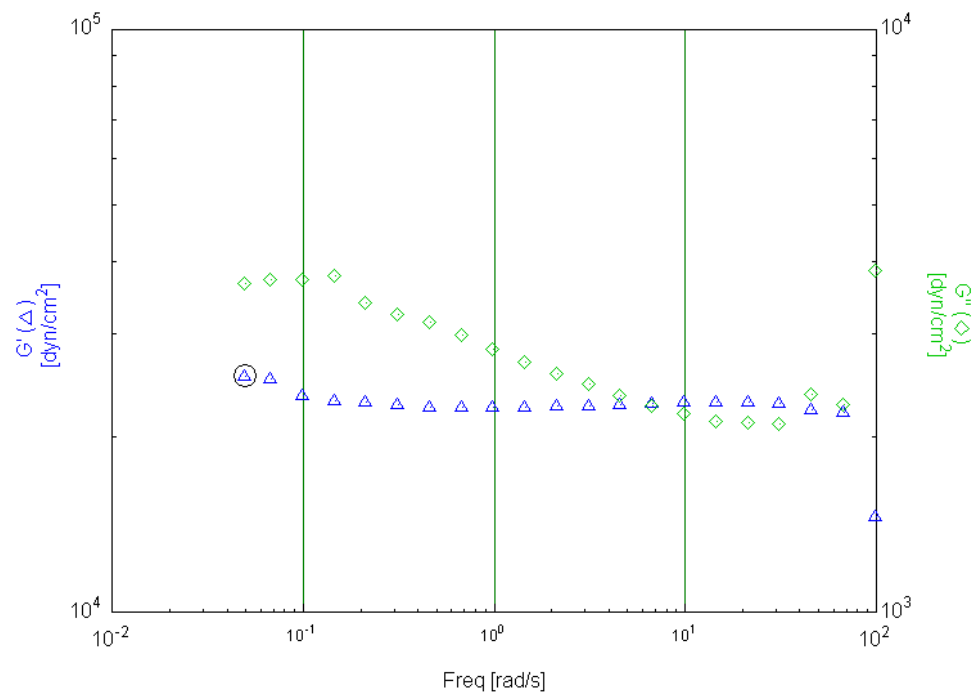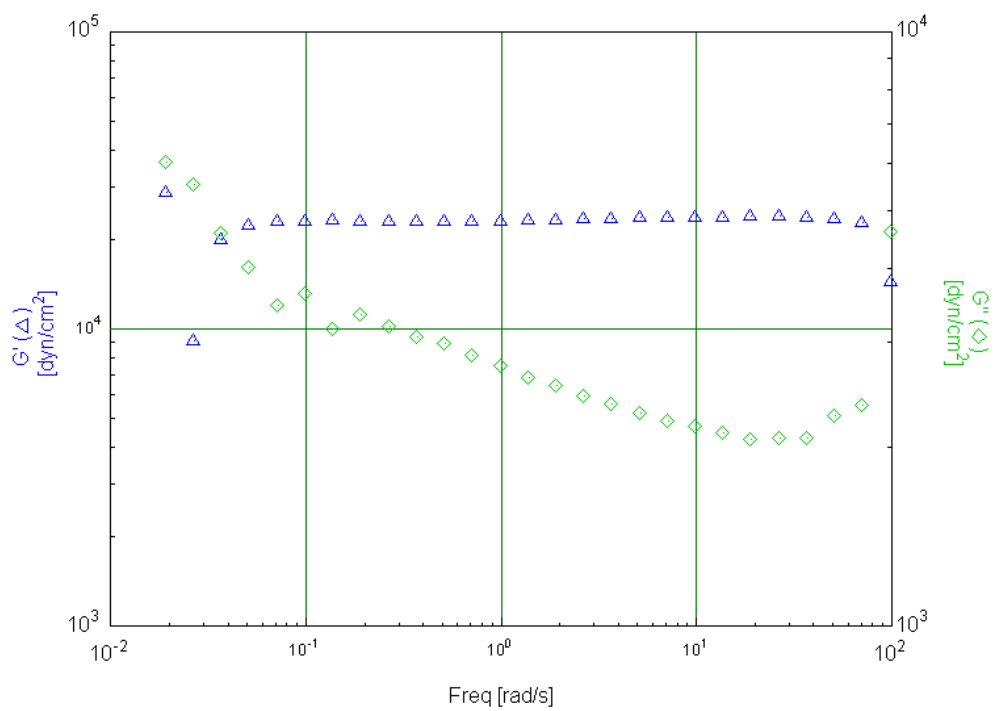

Supplement: Supplementary file 1 [file 3861034]
